# Supplementary material for: Application of magnetic material in the determination of polycyclic aromatic hydrocarbons in tree leaves by high performance liquid chromatography
Source: Royal Society of Chemistry journal article supplement (doi:10.1039/c1ay05414g), 2011-01-01
Supplement: c1ay05414g.pdf [file c1ay05414g.pdf]

## Supplementary Information

### Figure legends:

Fig.S1. Synthesis of  $\text{Fe}_3\text{O}_4/\text{C}$  magnetic particles.

Fig.S2 The effect of solvent on the extraction yields of PAHs. Conditions of the extraction: 1.0 g sample; solvent volume: 20 mL; MAE time: 3 min.

Fig. S3. Recoveries of PAHs from aged samples after MAE.

Fig. S4 The response surface of BaA with different radiation power and time.

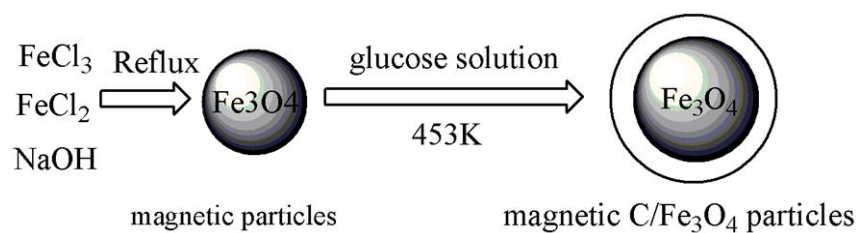

Fig. S1

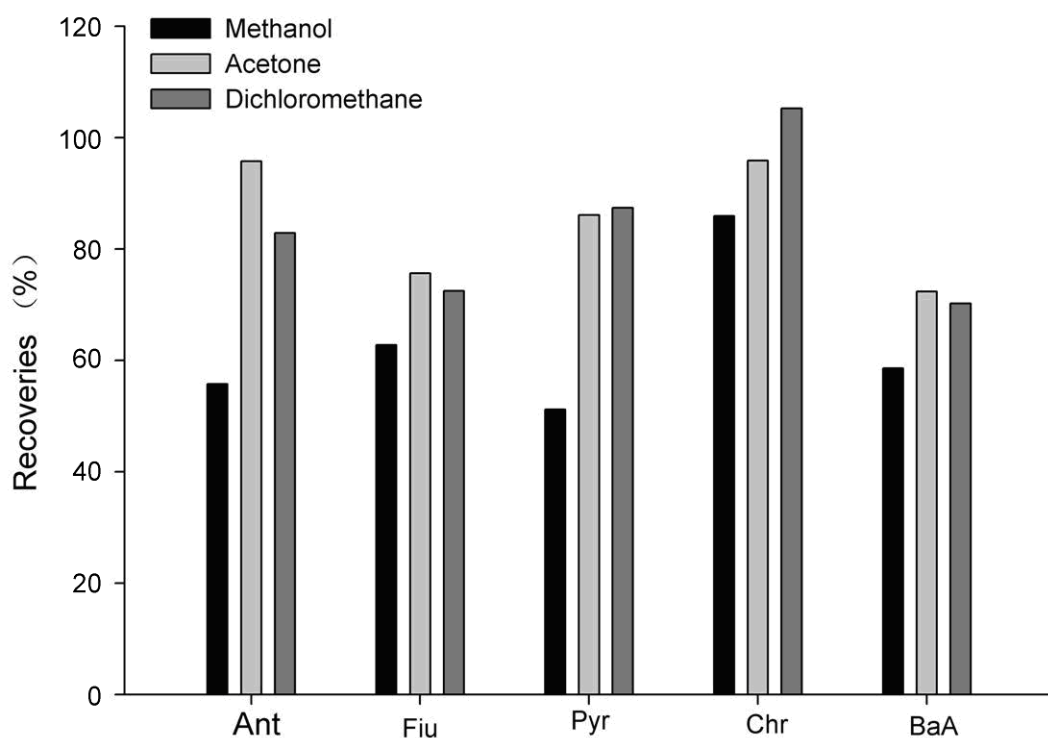

Fig. S2

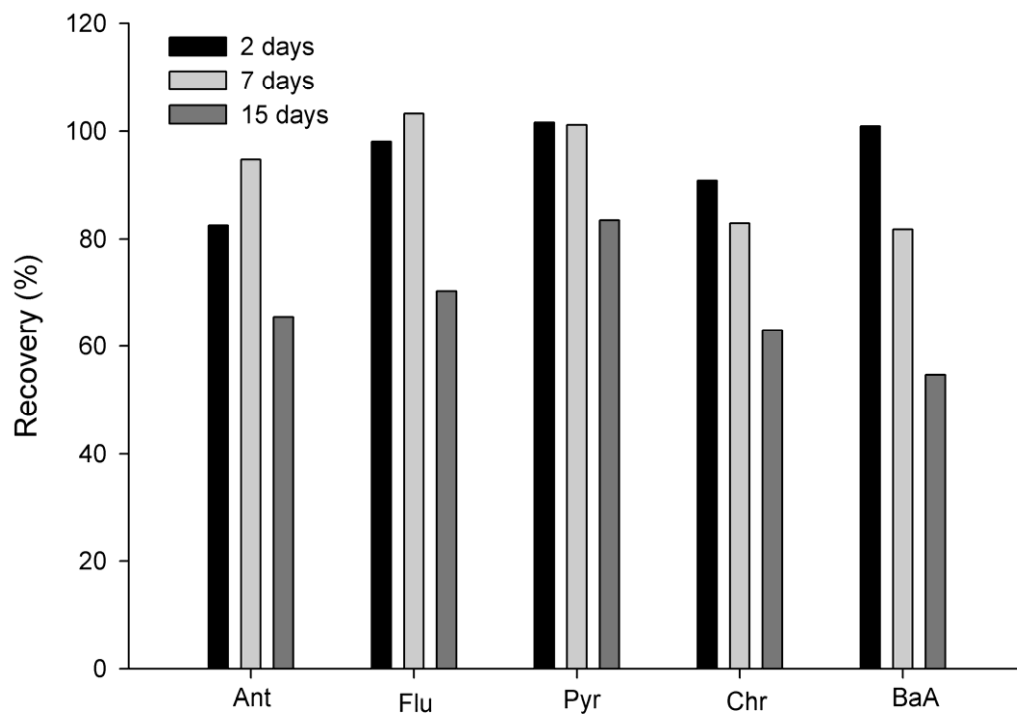

Fig. S3

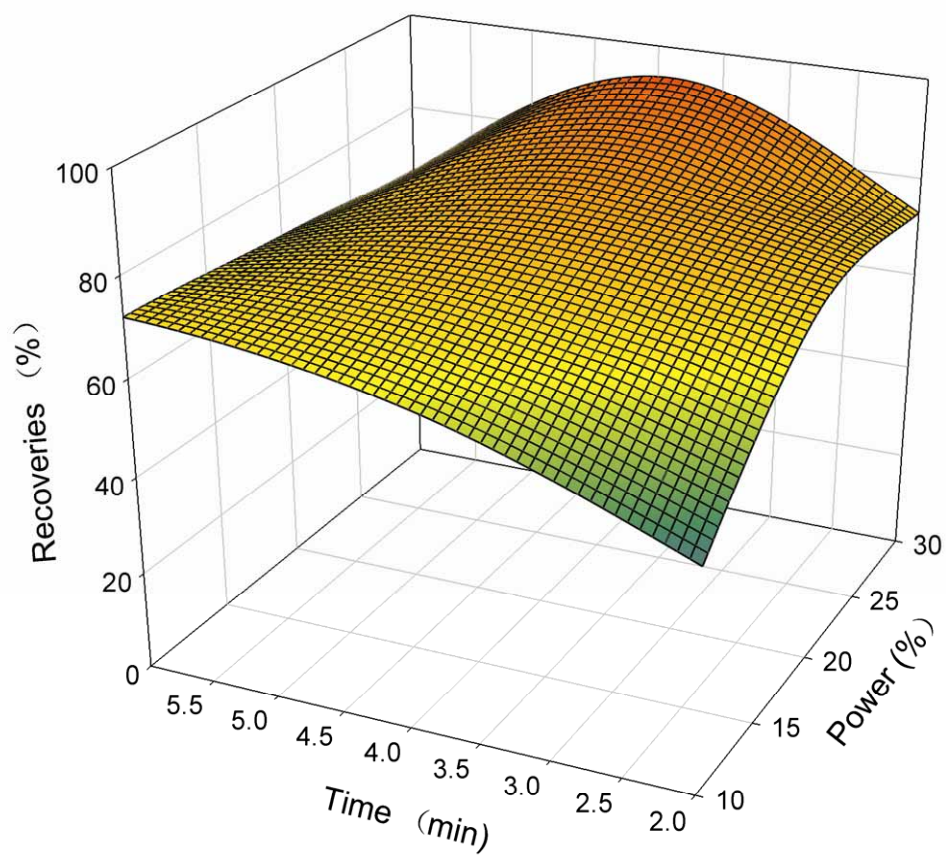

Fig.S4

Table S1

Runs employed for the effect of the radiation conditions over the recovery

| Run number | 1   | 2   | 3   | 4   | 5   | 6   | 7   | 8   | 9   | 10  | 11  |
|------------|-----|-----|-----|-----|-----|-----|-----|-----|-----|-----|-----|
| Power (W)  | 200 | 200 | 200 | 400 | 400 | 400 | 400 | 400 | 600 | 600 | 600 |
| Time (min) | 2   | 4   | 6   | 2   | 4   | 4   | 4   | 6   | 2   | 4   | 6   |
